# Supplementary material for: Therapeutic Potential of Human Umbilical Cord-Derived Mesenchymal Stem Cells in Recovering From Murine Pulmonary Emphysema Under Cigarette Smoke Exposure
Source: PubMed Central journal article supplement (PMC8502916; doi:10.3389/fmed.2021.713824), 2021-09-27

# Supplementary Information

## Therapeutic Potential of Human Umbilical Cord-Derived Mesenchymal Stem Cells in Recovering from Murine Pulmonary Emphysema under Cigarette Smoke

### Exposure

Xiao-Yue Chen<sup>1,2</sup> (MSc), Yi-Ying Chen<sup>2</sup> (MSc), Willie Lin<sup>3</sup> (PhD), Chien-Han Chen<sup>3</sup> (MSc), Yu-Chieh Wen<sup>3</sup> (MSc), Ta-Chih Hsiao<sup>4</sup> (PhD), Hsiu-Chu Chou<sup>5</sup> (PhD), Kian Fan Chung (MD, PhD)<sup>6</sup>, Hsiao-Chi Chuang<sup>2,7,8\*</sup> (PhD)

<sup>1</sup>Graduate Institute of Medical Sciences, College of Medicine, Taipei Medical University, Taipei, Taiwan

<sup>2</sup>School of Respiratory Therapy, College of Medicine, Taipei Medical University, Taipei, Taiwan

<sup>3</sup>Meridigen Biotech Co., Ltd., Taipei, Taiwan

<sup>4</sup>Graduate Institute of Environmental Engineering, National Taiwan University, Taipei, Taiwan

<sup>5</sup>Department of Anatomy and Cell Biology, School of Medicine, College of Medicine, Taipei Medical University, Taipei, Taiwan

<sup>6</sup>National Heart and Lung Institute, Imperial College London, London, UK

<sup>7</sup>Division of Pulmonary Medicine, Department of Internal Medicine, Shuang Ho Hospital, Taipei Medical University, New Taipei City, Taiwan

<sup>8</sup>Cell Physiology and Molecular Image Research Center, Wan Fang Hospital, Taipei Medical University, Taipei, Taiwan

## Supplementary Information

**Table S1. Expression of cell surface markers on hUC-MSCs.**

The cell surface markers on hUC-MSCs were determined by flow cytometry. The hUC-MSCs positively expressed the CD44, CD73, CD90, and CD105, whereas negative expression of CD11b, CD19, CD34, CD45, and HLA-DR.

| Positive Markers            | Positive cells (%) |
|-----------------------------|--------------------|
| CD44                        | 100                |
| CD73                        | 100                |
| CD90                        | 98.9               |
| CD105                       | 99.8               |
| Negative Markers            |                    |
| CD11b/CD19/CD34/CD45/HLA-DR | 0.41               |

## Supplementary Information

**Figure S1. The change of body weight and serum level of TNF- $\alpha$  with CS exposure before hUC-  
MSC administration.**

(A) The body weight was significantly decreased during the CS exposure. (B) A significant increase in TNF- $\alpha$  in the serum of mice after CS exposure for 4 months. The results were analyzed by an unpaired *t*-test. *n* = 8~10 per group. \**p* < 0.05, \*\**p* < 0.01, \*\*\*\**p* < 0.0001.

(A)

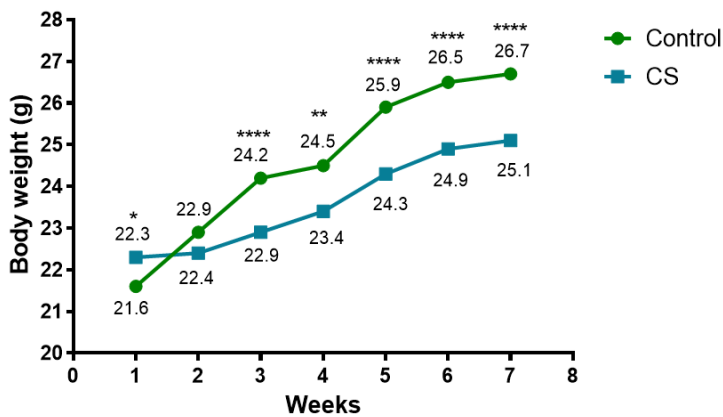

(B)

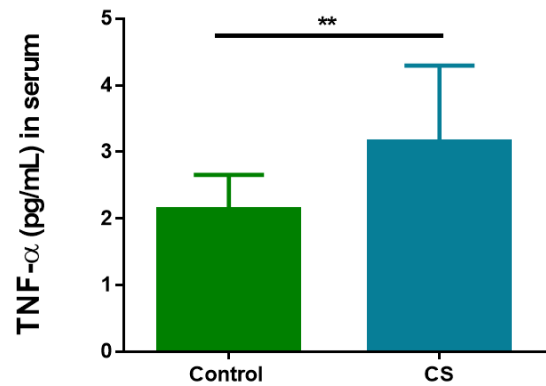

## Supplementary Information

Figure S2. The body weight difference before and after 4-week hUC-MSC administration. n = 8~10 per group.

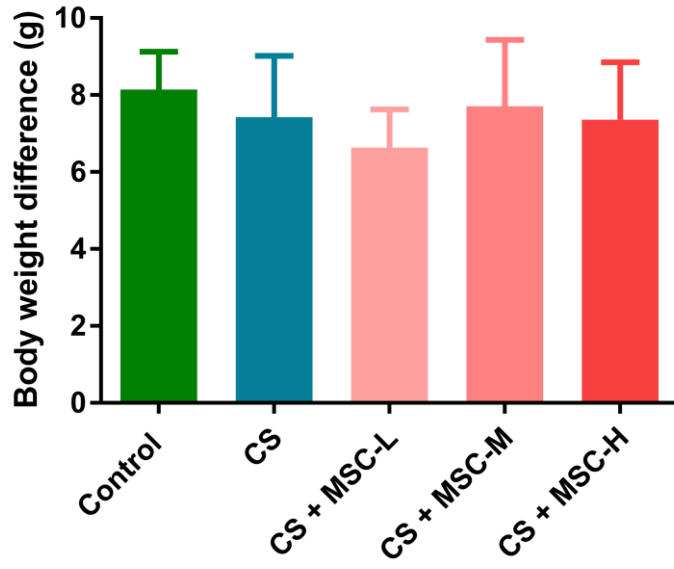

Supplement: Data_Sheet_1.pdf [file Data_Sheet_1.pdf]
